# Supplementary material
Source: PubMed Central journal article supplement (PMC9536121)
Supplement: sj-pdf-2-jcb-10.1177_0271678X221105668.pdf [file sj-pdf-2-jcb-10.1177_0271678X221105668.pdf]

**Supplementary Table 1**

| Patient # | Age | Sex    | Ethnicity | Cause of Death                                          | Neuropathology Final Anatomic Diagnosis                                                                                                                                                                                                                                                                                  |
|-----------|-----|--------|-----------|---------------------------------------------------------|--------------------------------------------------------------------------------------------------------------------------------------------------------------------------------------------------------------------------------------------------------------------------------------------------------------------------|
| 1         | 80  | Male   | Asian     | Metastatic pancreatic adenocarcinoma                    | <ul style="list-style-type: none"><li>• Cerebral atherosclerosis, mild</li><li>• Cerebrovascular arteriosclerosis, moderate</li><li>• Lacunar infarct, subacute on chronic, evidenced in the left frontal lobe</li><li>• Frontal lobe: diffuse vascular congestion</li><li>• No evidence of metastatic disease</li></ul> |
| 2         | 47  | Female | Caucasian | Obesity complicated by sudden death                     | <ul style="list-style-type: none"><li>• Cerebrovascular atherosclerosis, mild</li><li>• Cerebrovascular arteriosclerosis, mild</li></ul>                                                                                                                                                                                 |
| 3         | 67  | Male   | Hispanic  | Atherosclerotic and hypertensive cardiovascular disease | <ul style="list-style-type: none"><li>• Cerebrovascular atherosclerosis, mild to moderate</li><li>• Cerebrovascular arteriosclerosis, moderate to severe</li><li>• Lacunar infarct, basal ganglia, right subacute-on-chronic</li></ul>                                                                                   |
