# Supplementary material
Source: PubMed Central journal article supplement (PMC9536121)
Supplement: sj-pdf-3-jcb-10.1177_0271678X221105668.pdf [file sj-pdf-3-jcb-10.1177_0271678X221105668.pdf]

**Supplementary Table 2** Average measures of the intraclass correlation coefficient of the first and second lesion ‘burden’ scoring of each of the two raters for the two MRI sequences.

| MRI sequence               | Intraclass Correlation Coefficient |                         |             |        |                          |     |         |
|----------------------------|------------------------------------|-------------------------|-------------|--------|--------------------------|-----|---------|
|                            | Intraclass Correlation             | 95% Confidence Interval |             | Value  | F Test with True Value 0 |     | P-value |
|                            |                                    | Lower Bound             | Upper bound |        | df1                      | df2 |         |
| T2-weighted – Rater 1 (SC) | 0.985                              | 0.949                   | 0.996       | 64.020 | 11                       | 11  | <0.001  |
| T2-weighted – Rater 2 (BM) | 0.972                              | 0.907                   | 0.992       | 35.380 | 11                       | 11  | <0.001  |
| VFA-SPGR – Rater 1 (SC)    | 0.977                              | 0.916                   | 0.994       | 40.544 | 10                       | 10  | <0.001  |
| VFA-SPGR – Rater 2 (BM)    | 0.983                              | 0.938                   | 0.995       | 65.325 | 10                       | 10  | <0.001  |
