# Supplementary material
Source: PubMed Central journal article supplement (PMC9536121)
Supplement: sj-pdf-4-jcb-10.1177_0271678X221105668.pdf [file sj-pdf-4-jcb-10.1177_0271678X221105668.pdf]

**Supplementary Table 3** Average measures of the intraclass correlation coefficient between the two raters for the two MRI sequences.

| MRI sequence               | Intraclass Correlation Coefficient |                         |             |        |                          |     |         |
|----------------------------|------------------------------------|-------------------------|-------------|--------|--------------------------|-----|---------|
|                            | Intraclass Correlation             | 95% Confidence Interval |             | Value  | F Test with True Value 0 |     |         |
|                            |                                    | Lower Bound             | Upper bound |        | df1                      | df2 | P-value |
| T2-weighted – Rater 1 vs 2 | 0.972                              | 0.825                   | 0.984       | 33.465 | 11                       | 11  | <0.001  |
| VFA-SPGR – Rater 1 vs 2    | 0.985                              | 0.937                   | 0.995       | 59.313 | 10                       | 10  | <0.001  |
